# Supplementary material for: Harm of circadian misalignment to the hearts of the adolescent wistar rats
Source: Springer Nature journal article supplement (doi:10.1186/s12967-022-03546-w), 2022-08-06

# Supplementary Figure 1 (Figure S1):

## A: Experiment and modeling cycle

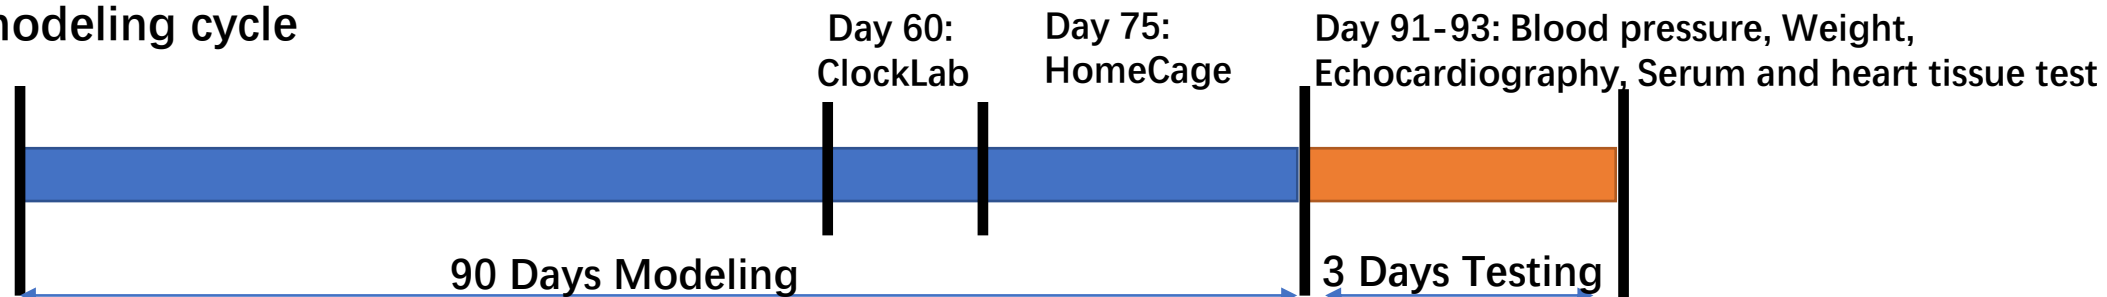

## B: Modeling method

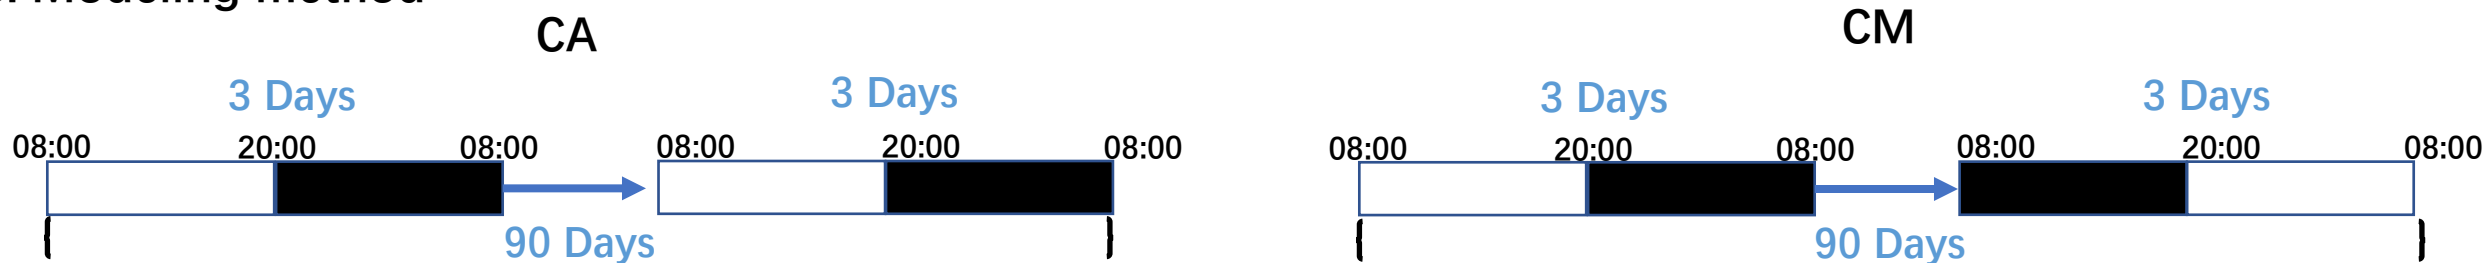

## C: Distribution of experimental time and number of rats in two parts

### Part 1: CA, 45 Rats; CM, 45 Rats

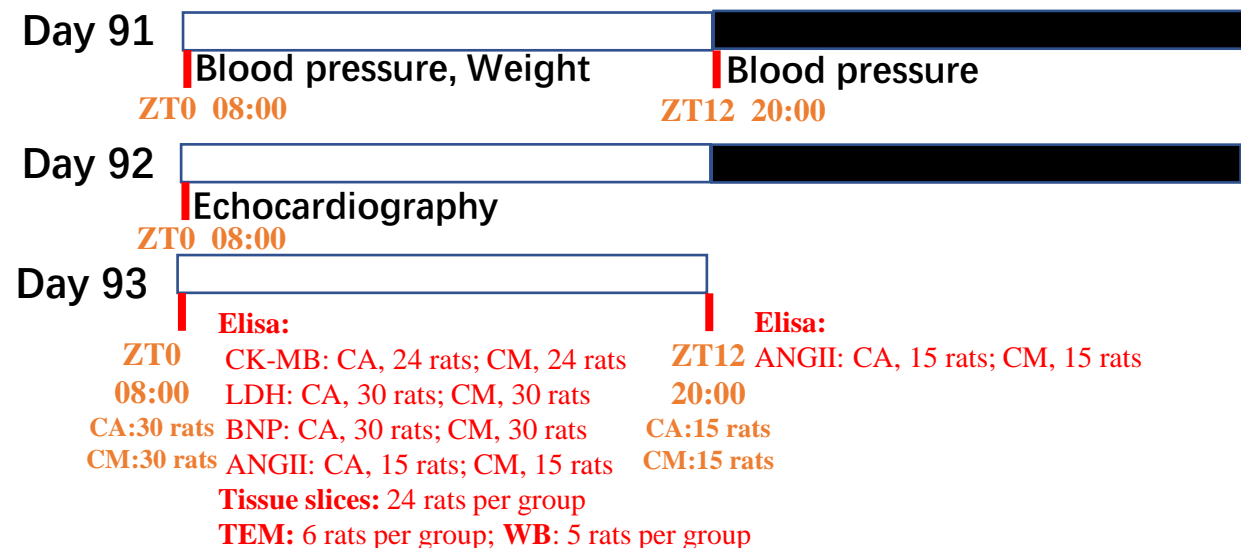

### Part 2: CA, 30 Rats; CM, 30 Rats

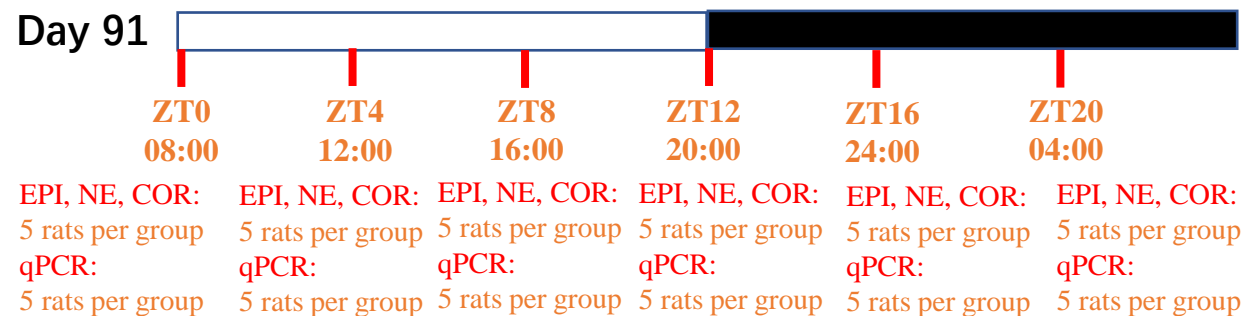

### Part 3: CA, 12 Rats; CM, 12 Rats

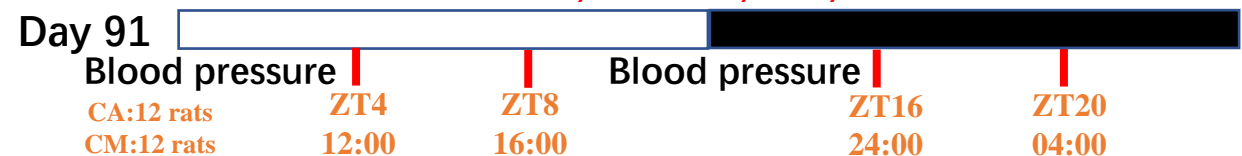

Supplement: MOESM1 [file 23342938]
