# Supplementary material for: Harm of circadian misalignment to the hearts of the adolescent wistar rats
Source: Springer Nature journal article supplement (doi:10.1186/s12967-022-03546-w), 2022-08-06

Figure S2

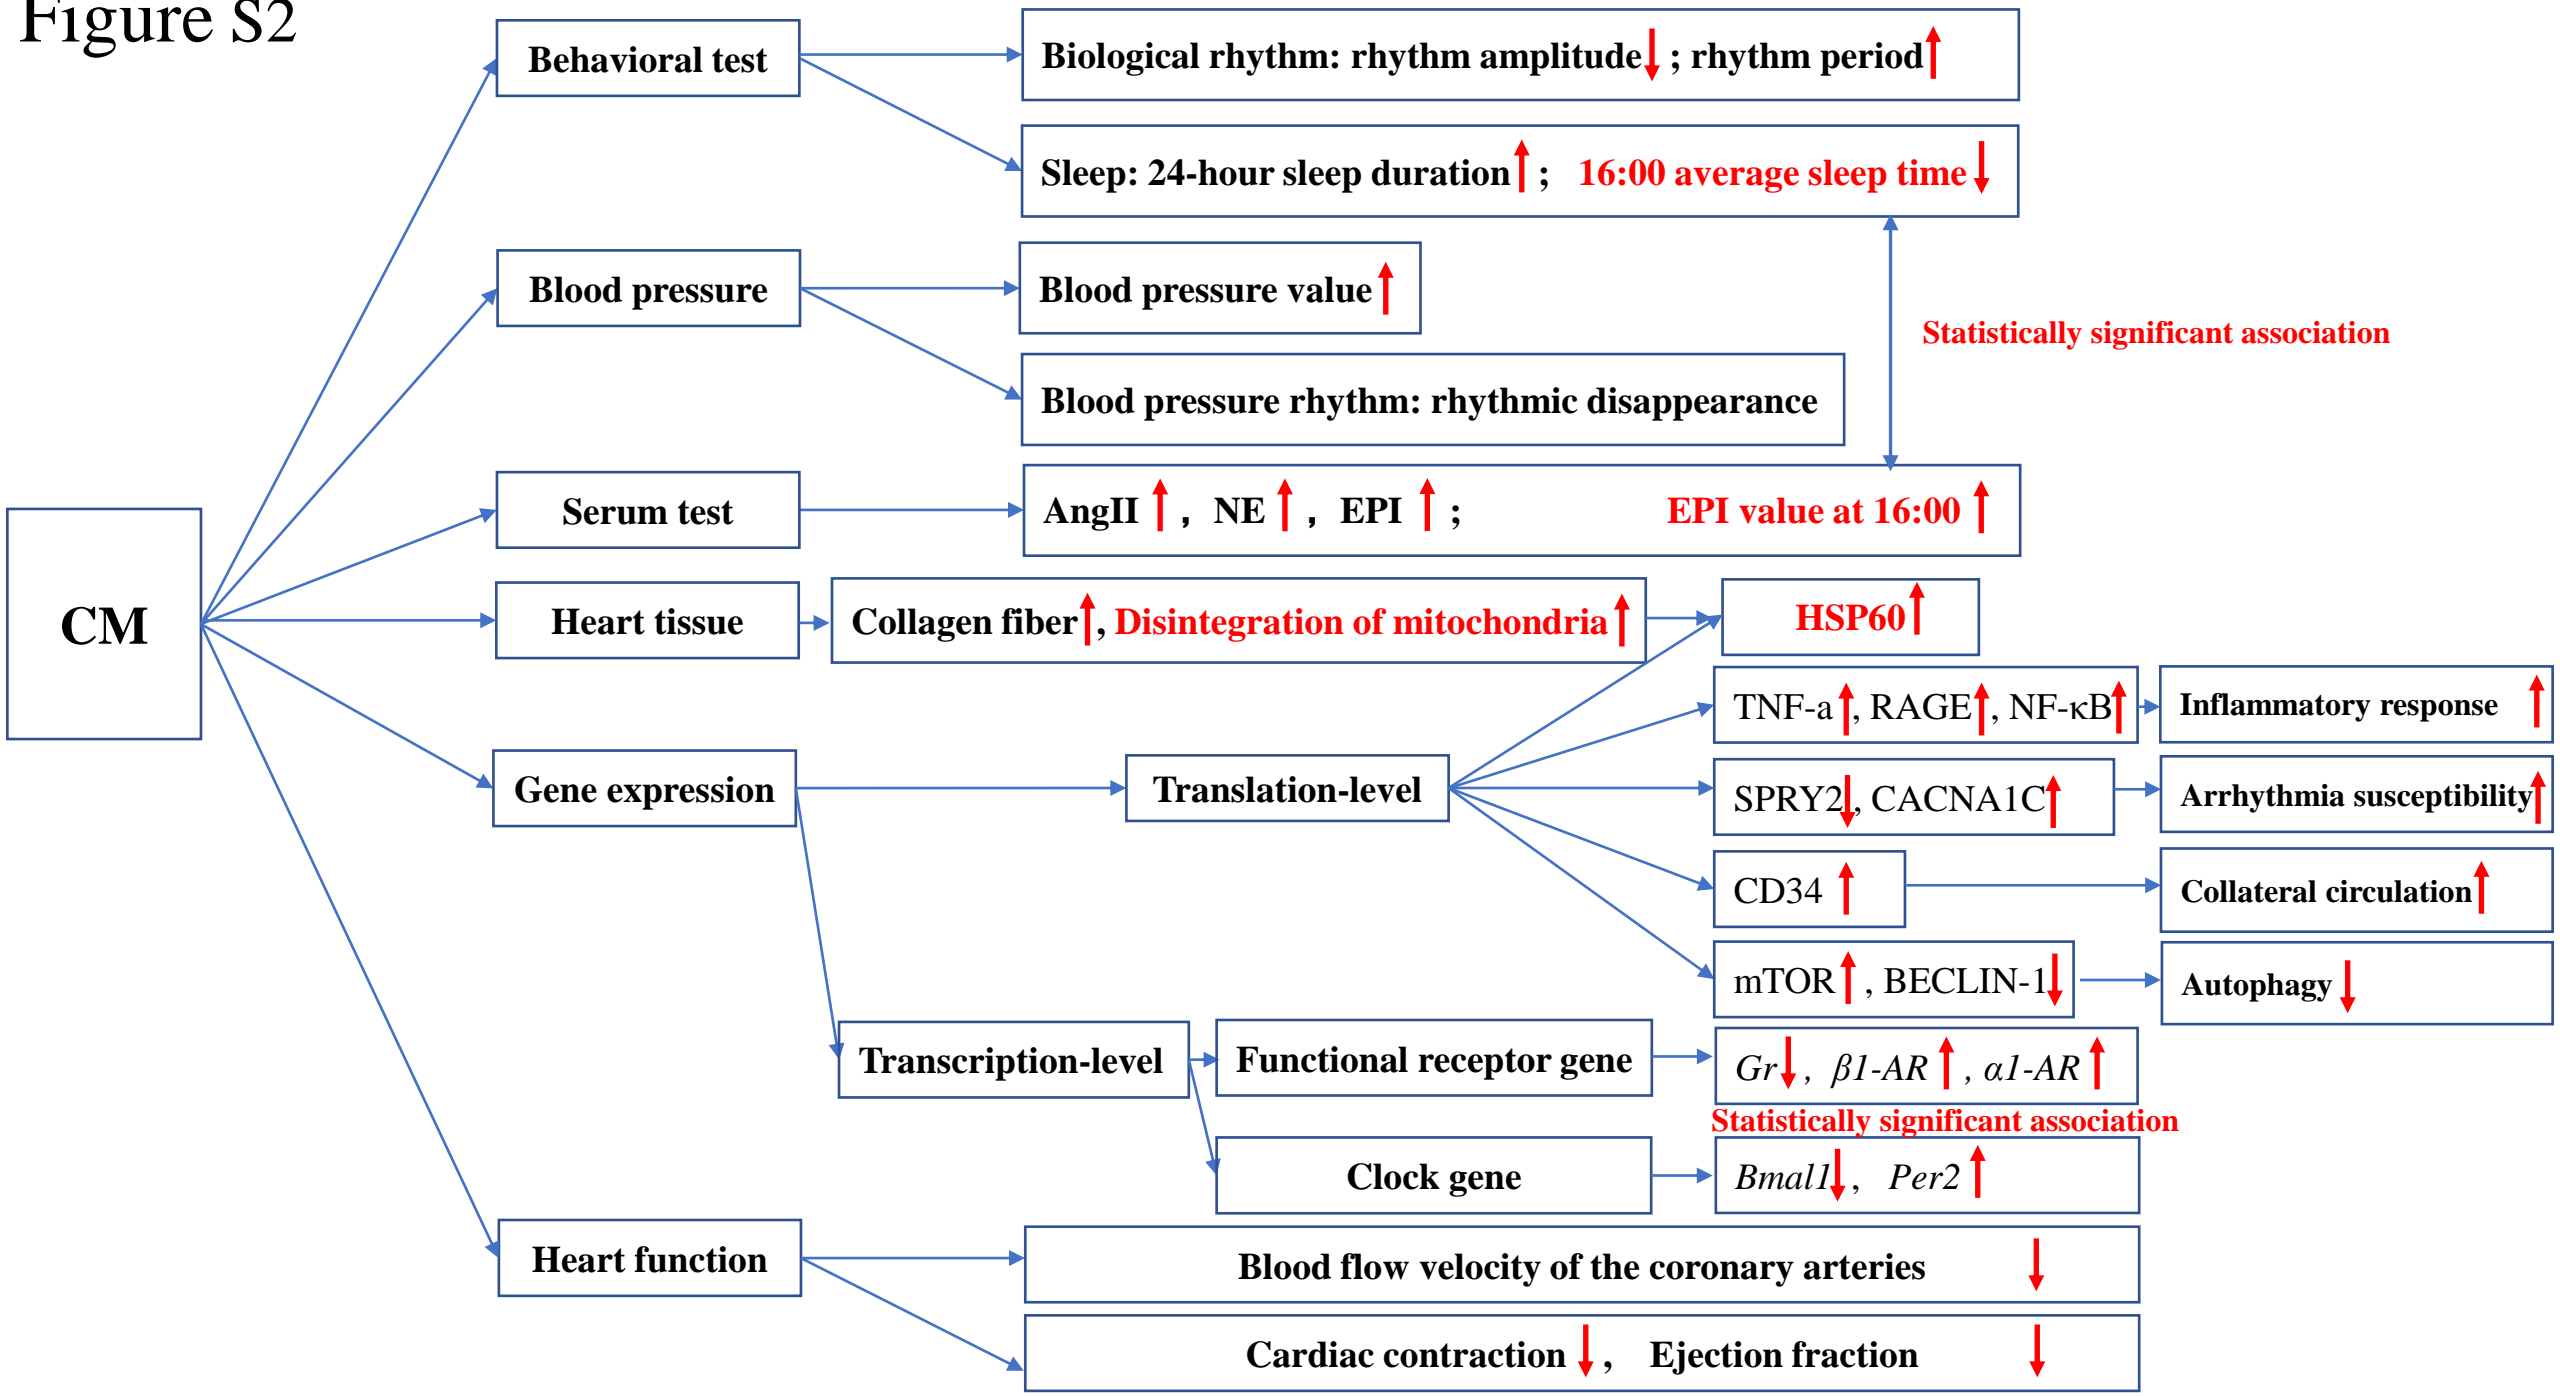

Supplement: MOESM2 [file 23342938]
